# Supplementary material for: 7，7－二氯双环[4，1，0]庚烷与活性亚甲基化合物的反应
Source: Springer Nature journal article supplement (doi:10.1186/s12974-015-0343-3), 2003-01-01
Supplement: MOESM1 [file 9768742]

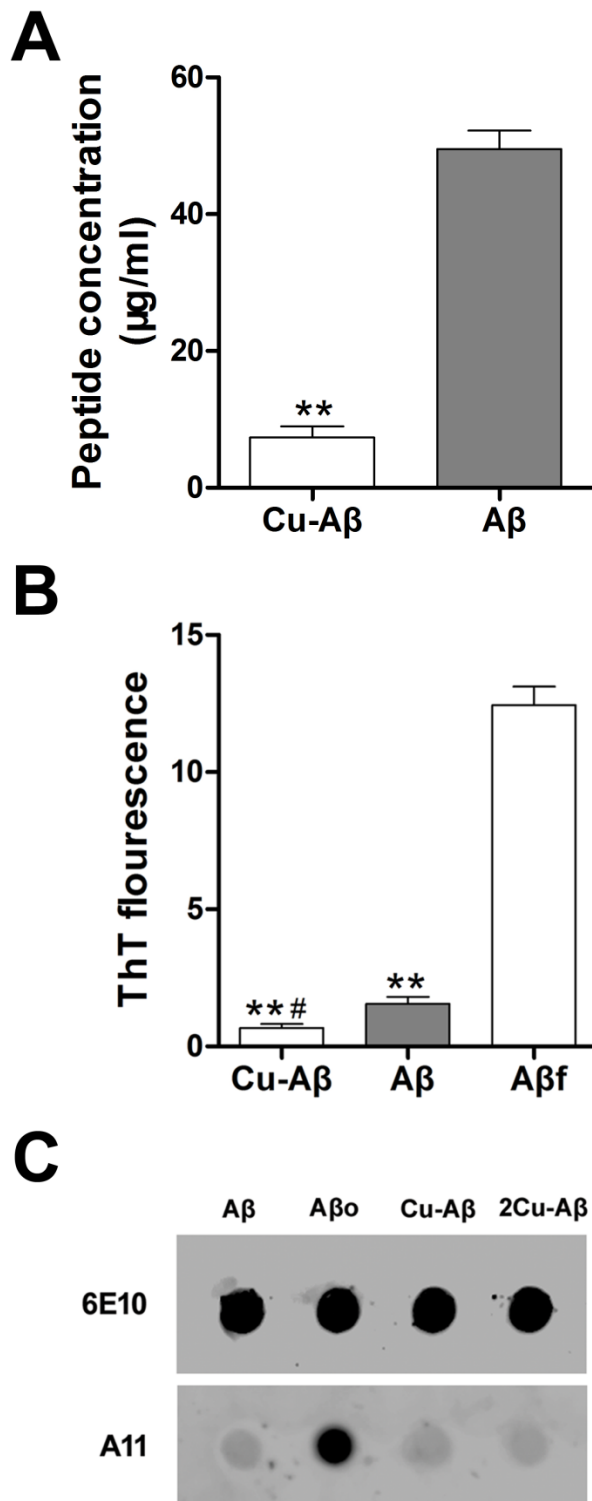

**Additional file 1: Figure S1**

Formation of the Cu(II)-Aβ complex. (A) Peptide concentration in the supernatant of

reaction mixtures containing A $\beta$ <sub>1-40</sub> (50  $\mu$ M) with or without Cu(II) (50  $\mu$ M). (B) Effect of Cu(II) on the formation of A $\beta$  fibrils. The amyloid fibril formation of A $\beta$ <sub>1-40</sub> in the presence of Cu(II) (50  $\mu$ M) was determined using the thioflavin T (ThT) fluorescence assay. Fibrillar A $\beta$ <sub>1-40</sub> (A $\beta$ f, 50  $\mu$ M) was used as a positive conference. Data are expressed as the means  $\pm$  SEM of three independent experiments. Significance was tested by Student's *t* test. \*\**P* < 0.01 vs A $\beta$  (A) or A $\beta$ f (B); #*P* < 0.05 vs A $\beta$  (B). (C) Dot blot analysis of A $\beta$ <sub>1-40</sub> and Cu(II)-A $\beta$ <sub>1-40</sub> (with 1:1 or 1:2 of A $\beta$ : Cu(II) molar ratios) at a peptide concentration of 10  $\mu$ M. A $\beta$ <sub>1-40</sub> was incubated in 20 mM Hepes buffer (containing 153 mM NaCl; pH 6.6) in the presence or absence of Cu(II) for 24 h at 37  $^{\circ}$ C. Oligomeric A $\beta$ <sub>1-40</sub> (A $\beta$ o) was used as a positive control.
