# Supplementary material for: 7，7－二氯双环[4，1，0]庚烷与活性亚甲基化合物的反应
Source: Springer Nature journal article supplement (doi:10.1186/s12974-015-0343-3), 2003-01-01
Supplement: MOESM2 [file 9768742]

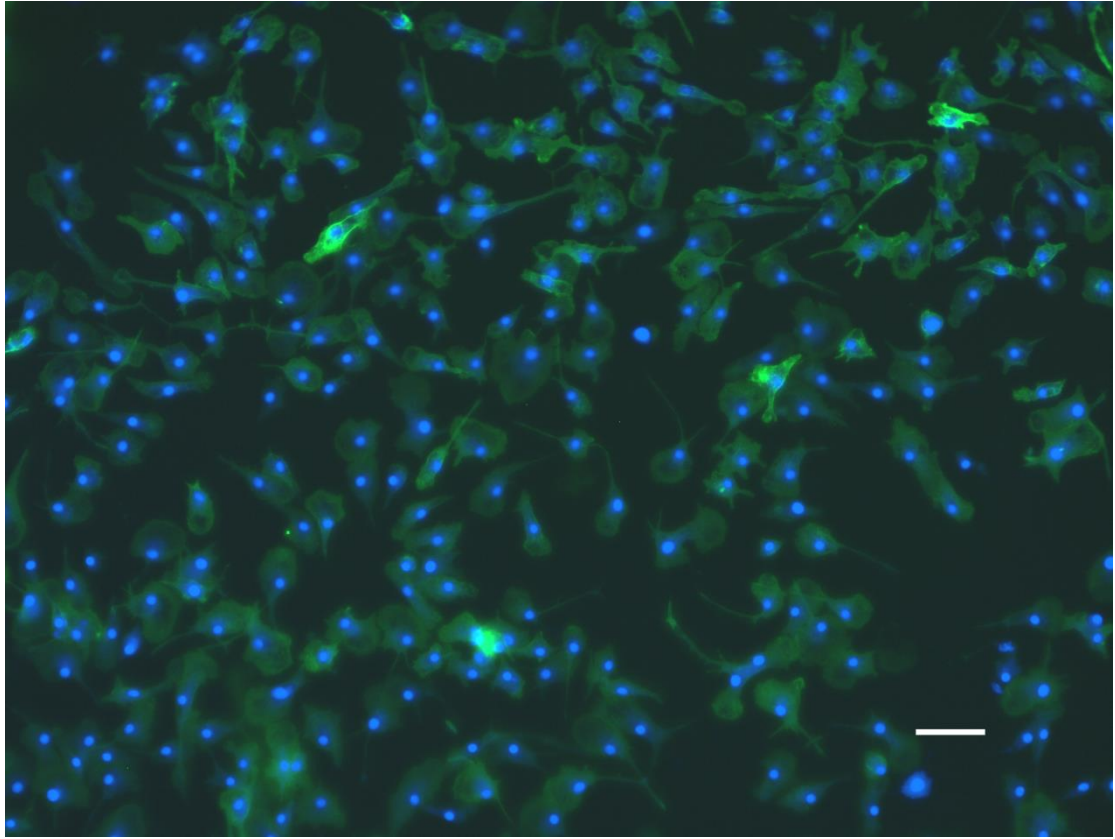

**Additional file 2: Figure S2**

Characterization of the microglial culture purity. Microglial cultures were immunostained with the microglial marker CD11b. Scale bar = 300  $\mu\text{m}$ .
