# Supplementary material for: 7，7－二氯双环[4，1，0]庚烷与活性亚甲基化合物的反应
Source: Springer Nature journal article supplement (doi:10.1186/s12974-015-0343-3), 2003-01-01
Supplement: MOESM3 [file 9768742]

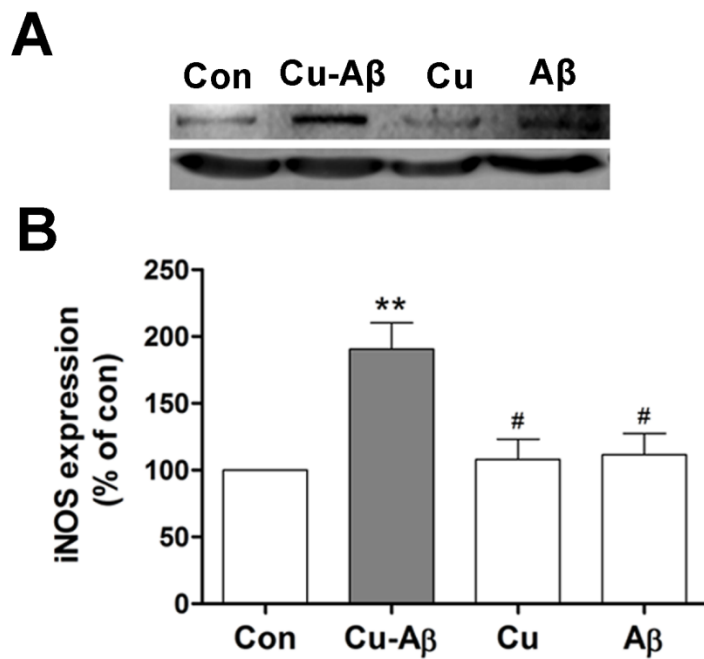

**Additional file 3: Figure S3**

Western blot analysis of iNOS expression in BV-2 cells. (A) Representative Western blots of iNOS in BV-2 cells after Cu(II)-A $\beta$ <sub>1-40</sub> (at 5  $\mu$ M peptide), Cu(II), or A $\beta$ <sub>1-40</sub> stimulation (for 24 h). (B) Densitometric analysis of iNOS/ $\beta$ -actin ratio normalized to saline control. n = 3 experiments. \*\* $P$  < 0.01 vs con; # $P$  < 0.05 vs Cu-A $\beta$ .
